# Supplementary material
Source: PubMed Central journal article supplement (PMC7413297)
Supplement: NIHMS1612803-supplement-SUPP_FIG_1.pdf [file NIHMS1612803-supplement-SUPP_FIG_1.pdf]

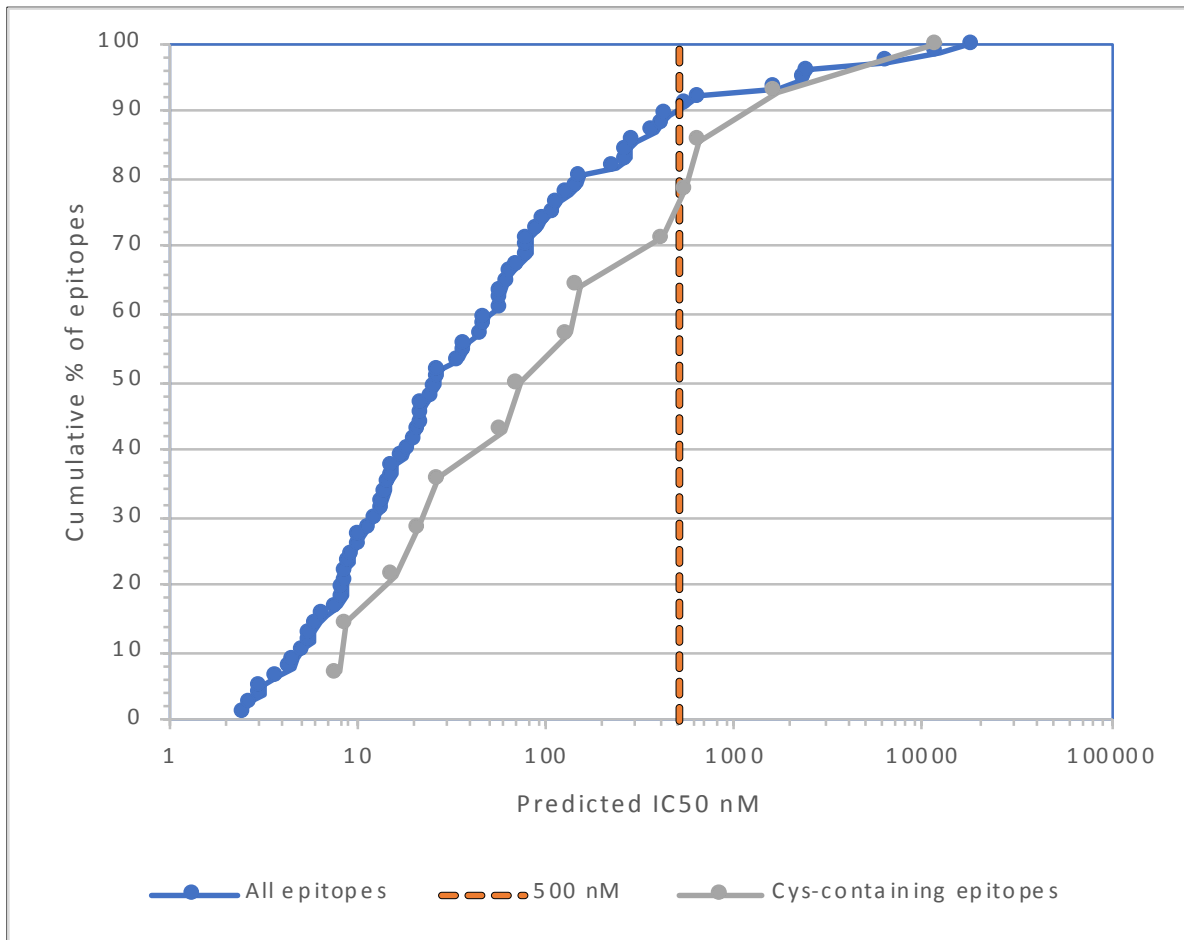

Plot of the predicted IC50 values for 77 epitopes. Curves indicate that while a predicted affinity threshold of 500 nM captures 90% of the epitopes it only captures 71% of those containing cysteine. Cys-containing epitopes 4 out of the 8 outliers in the set for which an IC50 of greater than 500 nM was predicted.

Supplemental Figure 1
